# Supplementary material for: The Pneumococcal Serine-Rich Repeat Protein Is an Intra-Species Bacterial Adhesin That Promotes Bacterial Aggregation In Vivo and in Biofilms
Source: PLOS journal article supplement (doi:10.1371/journal.ppat.1001044), 2010-08-12
Supplement: S1 (10.1371/journal.ppat.1001044.s001) [file journal.ppat.1001044.s001]

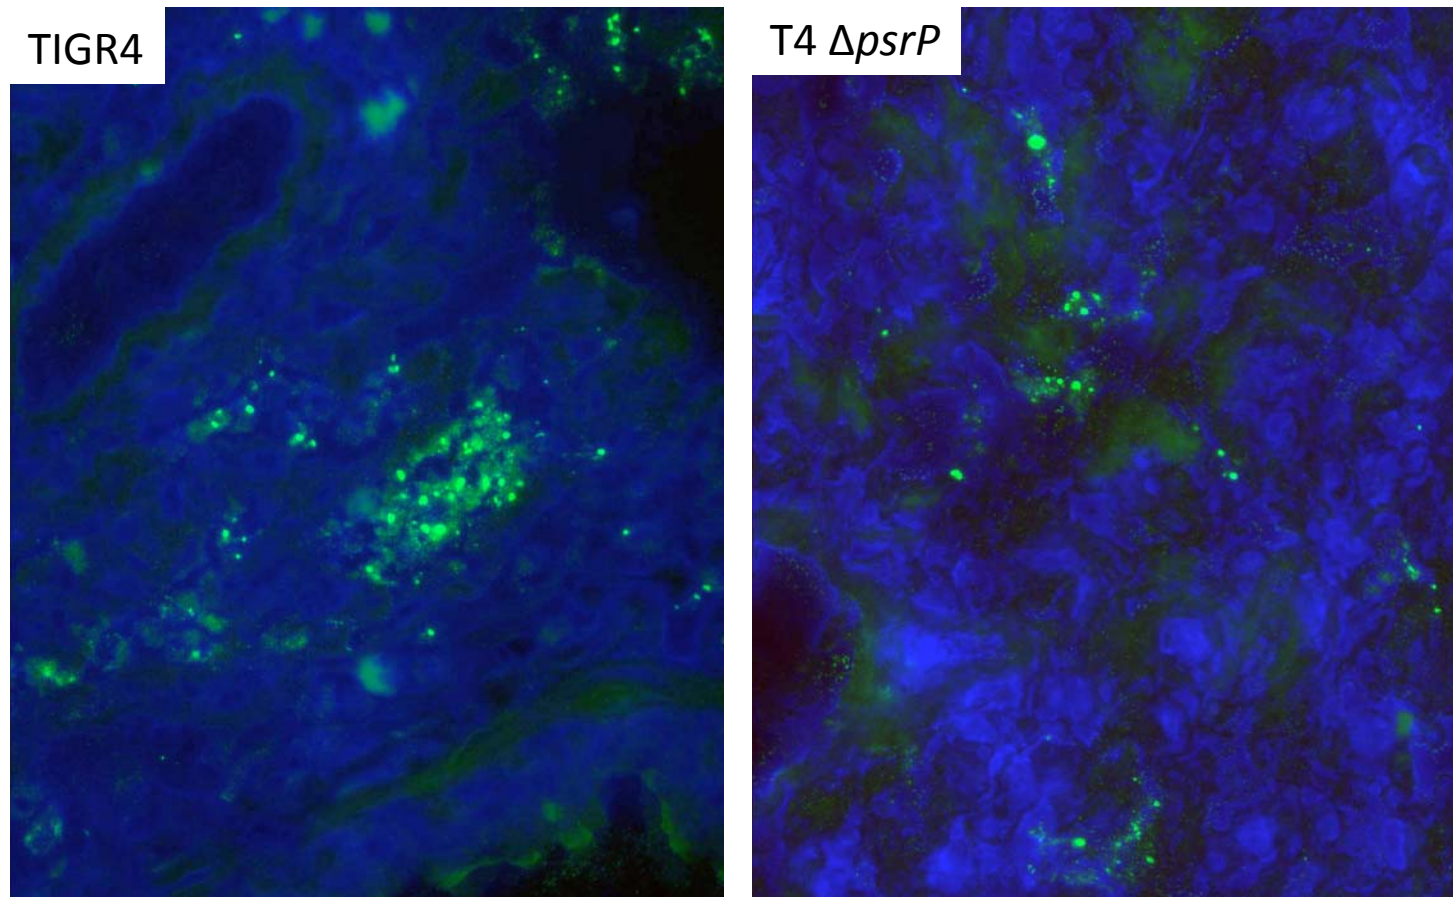

**Figure S1. Immunofluorescent imaging of *S. pneumoniae* in the alveolar space.** Frozen lung sections from TIGR4 and T4  $\Delta psrP$  infected mice were processed for imaging using anti-serotype 4 capsular antiserum (Statens Serum Institute; Denmark). Images were taken at 600X and are representative. Note the detection of a large bacterial aggregate (green) for TIGR4 infected animals, whereas for mice infected with T4  $\Delta psrP$  smaller clusters are evident.
